# Supplementary material for: Surgical, oncological and obstetric outcomes of Shimodaira-Taniguchi conization method
Source: Research Square preprint supplement (doi:10.21203/rs.3.rs-3215809/v1), 2023-08-31
Supplement: Supplementary file 1 [file 28a8f1742e5bdb09772ae386.xlsx]

## Sheet: Sheet1 (2)
Table 4: Univariate and multivariate Cox regression analyses for recurrent/persistent disease after conization
Variable		Univarible analysisa			Multivariate analysisa
		HR	95% CI	P value	HR	95% CI	P value
Age (years)
	45<	1			1
	45≥	3.17	1.724-5.828	<0.001	3.22	1.73-6.02	<0.001
Number of resected specimen
	1	1
	2≥	0.755	0.318-1.793	0.524	0.655	0.273-1.56	0.342
Surgical margin status
	Negative	1
	Positive	6.098	3.313-11.2	<0.001	6.39	3.44-11.8	<0.001
Smoking
	No	1
	Yes	1.129	0.5669-2.249	0.7298	1.21	0.607-2.431	0.581
a: Cox proportional, HR = hazard ratio, CI = confidence interval hazard model
