# Supplementary material for: Surgical, oncological and obstetric outcomes of Shimodaira-Taniguchi conization method
Source: Research Square preprint supplement (doi:10.21203/rs.3.rs-3215809/v1), 2023-08-31
Supplement: Supplementary file 2 [file 81e9e121520c34108a953bad.xlsx]

## Sheet: Sheet1
Table 6: Summary of previous articles regarding Shimodaira-Taniguchi conization for HSIL
Reference number	Number of patients	Post operative follow up duration (median or average months)	Recurrent and residual disease (%)	Margin positive (%)	Cervical stenosis (%)	Total number of delivery after conization	Preterm delivery (%)
[3]	522	19 (20-83)	25 (4.8)	87 (16.7)	28 (5.2)	N/A	N/A
[4]	1024	N/A	N/A	184 (18.0)	N/A	N/A	N/A
[5]	455	(13-60)	6 (1.3)	178 (39.1)	15 (3.3)	N/A	N/A
[6]	243	18.8 (1-100)	14 (5.8)	45 (19)	N/A	N/A	N/A
[7]	689	36.8 (0-107)	22 (3.2)	62 (13.4)	21 (3.0)	107	15 (14.0)
Current study	858	28 (14-49)	42 (4.9)	159 (18.5)	19 (2.2)	66	4 (6.1)
