# Supplementary material for: Surgical, oncological and obstetric outcomes of Shimodaira-Taniguchi conization method
Source: Research Square preprint supplement (doi:10.21203/rs.3.rs-3215809/v1), 2023-08-31
Supplement: Supplementary file 3 [file a10399aad4e9679abda942f3.xlsx]

## Sheet: Sheet1 (2)
Table 1: Patients’ characteristics
Number of patients		858
Age, median [IQR]		38 [33-45]
BMI, median [IQR]		20.7 [19.2-22.6]
Parity
	Yes	561
	No	297
Smoking status
	Yes	220
	No	638
Histology
	CIN2	27
	CIN3	831
Conization within one year after delivery
	Yes	61
	No	797
IQR: interquartile range
