# Supplementary material for: Surgical, oncological and obstetric outcomes of Shimodaira-Taniguchi conization method
Source: Research Square preprint supplement (doi:10.21203/rs.3.rs-3215809/v1), 2023-08-31
Supplement: Supplementary file 4 [file ccf553b8dc9809825346d230.xlsx]

## Sheet: Surgical outcome
Table 2: Surgical outcomes
Operative time (min.), median [IQR]		5.0 [3-8]
Blood loss (ml), No(%) patients
	≤50	834 (97.2)
	≥51	24 (2.8)
Weight of resected specimen (g), median [IQR]		3.0 [2-3.8]
Number of resected specimen, No(%) patients
	1	698 (81.3)
	≥2	160 (18.7)
Complication, No(%) patients
	Postoperative bleeding	71 (8.3)
	Cervical stenosis	19 (2.2)
	Fever	1 (0.1)
	Abdominal pain	2 (0.2)
Surgical margin status, No(%) patients
	Negative	699 (81.5)
	Positive	159 (18.5)
	Endocervical margin involvement
	Yes	86 (10.0)
	No	73 (8.5)
Follow up duration (month), median [IQR]		28 [14-49]
Cervical cytology within 3-4 months after conization
Negative for intraepithelial lesion and malignancy (NILM)		701 (81.7)
	Other	112 (13.1)
	N/A	45 (5.2)
Recurrence, No(%) patients
	Yes	42 (4.9)
	No	816 (95.1)
IQR: interquartile range
