# Supplementary material for: Surgical, oncological and obstetric outcomes of Shimodaira-Taniguchi conization method
Source: Research Square preprint supplement (doi:10.21203/rs.3.rs-3215809/v1), 2023-08-31
Supplement: Supplementary file 5 [file d11ec38d79aec5a612c90552.xlsx]

## Sheet: Stenosis (2)
Table 3: Factors potentially associated with cervical stenosis after conization
		Stenosis		P value
		Yes	No
Age				<0.001
	<45	6	625
	≥45	13	214
Number of resected specimens				0.358
	1	17	681
	≥2	2	158
Conization within one year after delivery				0.558
	No	17	780
	Yes	2	59
Intraoperative blood loss (ml)				0.455
	≤50	19	815
	≥51	0	24
Suturing for hemostasis
	No	16	761	0.338
	Yes	3	78
