# Supplementary material for: Surgical, oncological and obstetric outcomes of Shimodaira-Taniguchi conization method
Source: Research Square preprint supplement (doi:10.21203/rs.3.rs-3215809/v1), 2023-08-31
Supplement: Supplementary file 6 [file ef709120bd81f048b3887fe0.xlsx]

## Sheet: Sheet1 (12)
Table 5: Obstetrical outcomes after Shimodaira-Taniguchi conization
		Term pregnancy	Preterm pregnancy	P value
Number of live birth		62	4
Comorbidity
	No	55	4	0.918
	Myoma	2	0
	Obesity	3	0
	Asthma	2	0
Smoking
	No	42	3	0.763
	Yes	20	1
Interval from conization to conception
	≤3 months	8	2	0.045
	>3 months	54	2
Gestational age
	≤27w6d	0	1
	28w0d-31w6d	0	1
	32w0d - 33w6d	0	0
	34w0d - 36w6d	0	2
	37w0w	62	0
Mode of delivery
	Vaginal delivery	50	3	0.783
	Cesarean section	12	1
